# Supplementary material for: Prognostic Impact of FoxP3+ Regulatory T Cells in Relation to CD8+ T Lymphocyte Density in Human Colon Carcinomas
Source: PLOS journal article supplement (doi:10.1371/journal.pone.0042274), 2012-08-06

**Figure S1**

(a)

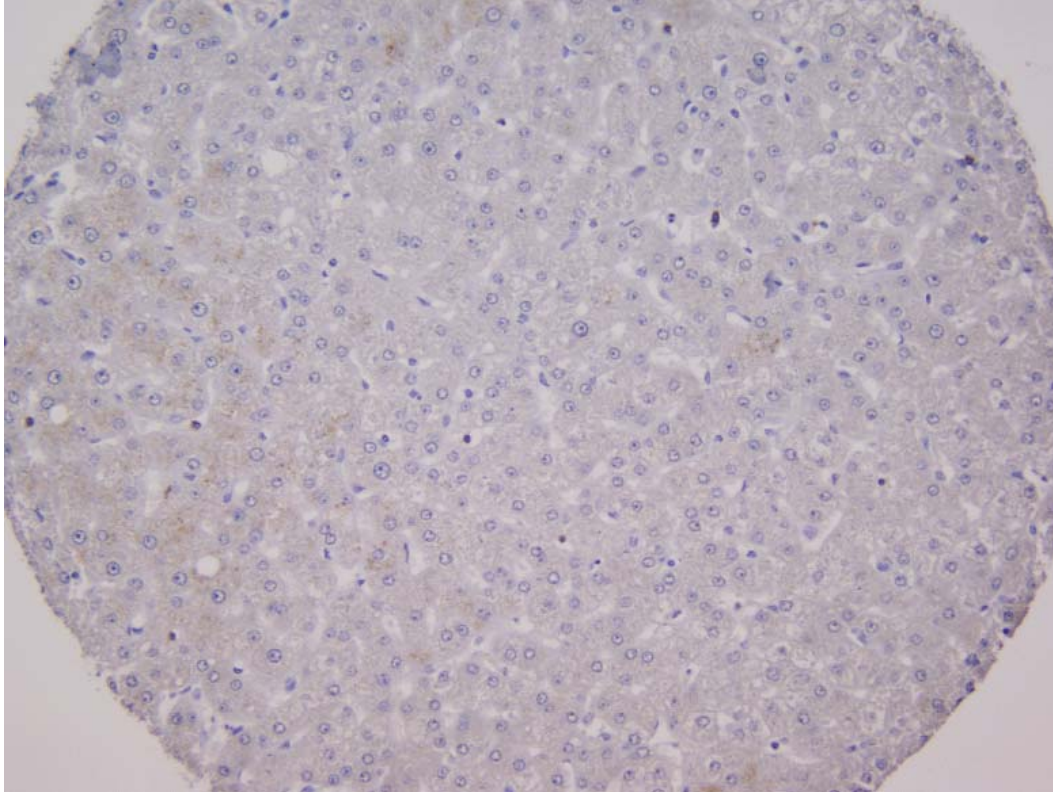

(b)

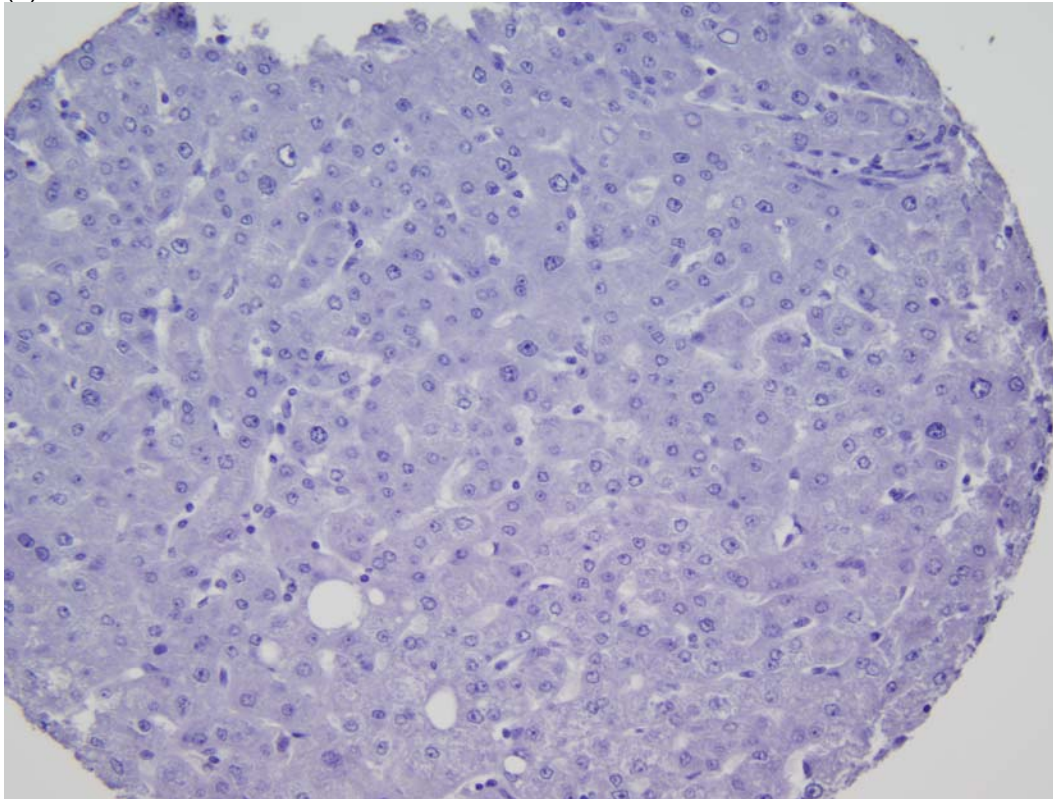

(c)

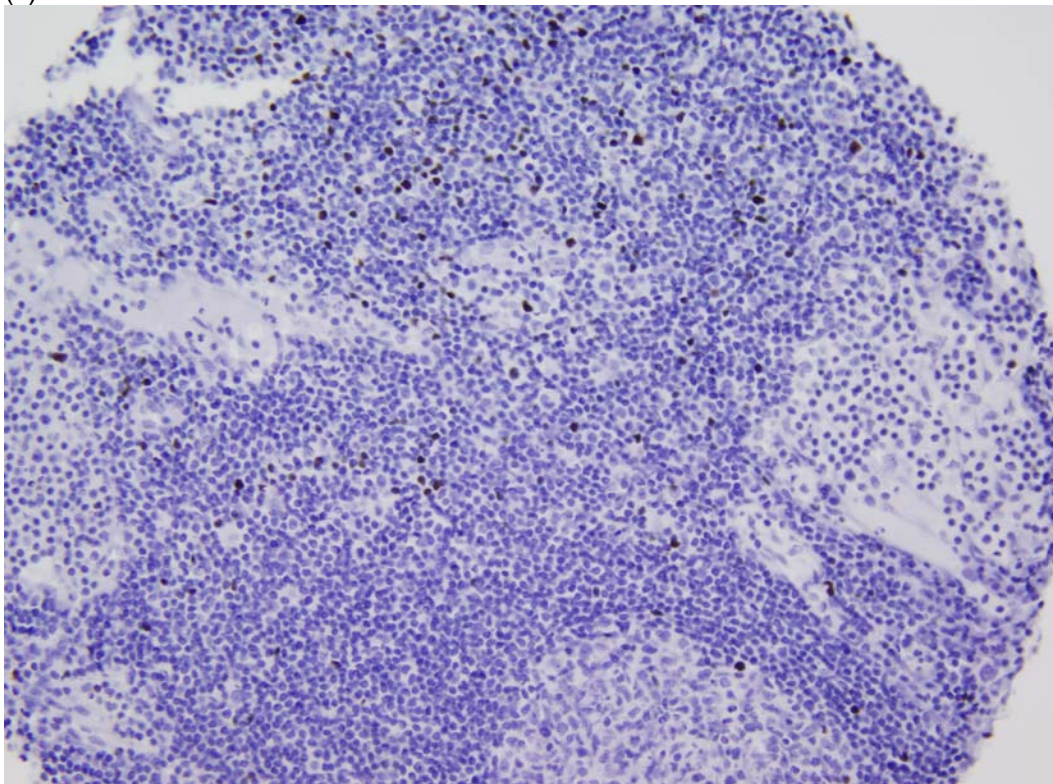

Supplement: S1 (10.1371/journal.pone.0042274.s001) [file journal.pone.0042274.s001]
